# Supplementary material for: A ferret model of COPD-related chronic bronchitis
Source: JCI journal article supplement (doi:10.1172/jci.insight.87536), 2016-09-21
Supplement: sd1 [file 1]

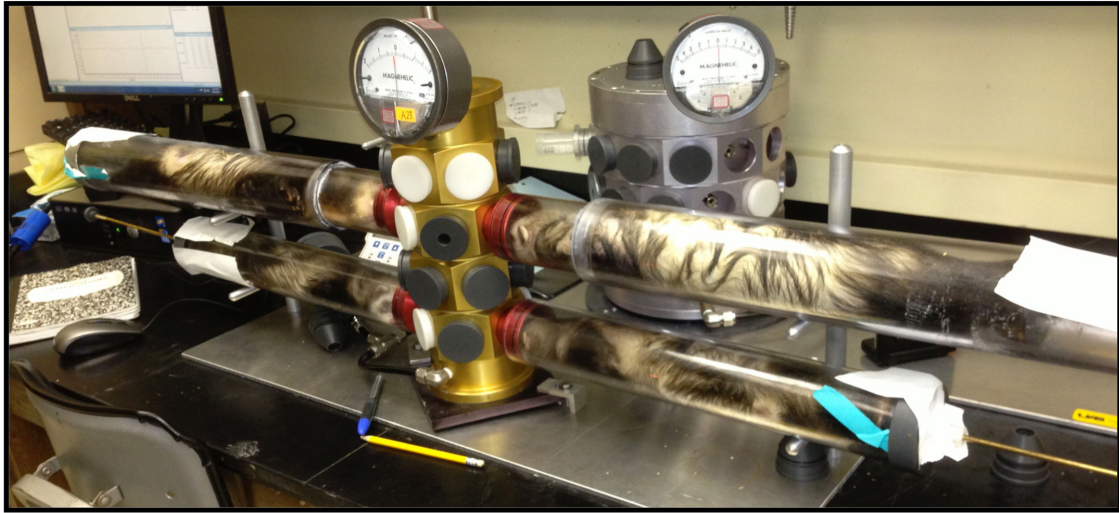

**Supplemental Figure 1. Cigarette smoke exposure system for ferrets.** Picture of ferrets undergoing cigarette smoke exposure in controlled apparatus.

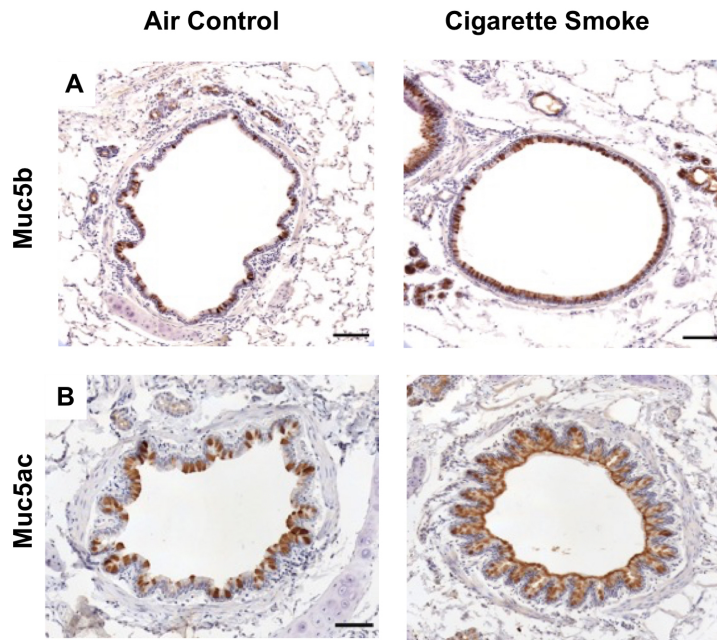

**Supplemental Figure 2. Mucin staining in cigarette smoke exposed ferrets.**

Representative photomicrograph of ferret airways following 6 months of cigarette smoke exposure vs. air control. **(A)** Muc5b staining. **(B)** Muc5ac staining. Scale bar 67  $\mu$ m.

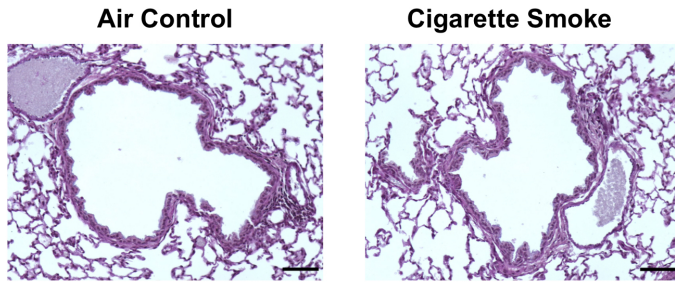

**Supplemental Figure 3.** Representative photomicrograph of mouse airways following 6 months of cigarette smoke exposure vs. air control. Scale bar 67  $\mu\text{m}$ .

**Supplemental Video 1.** Example cough in a ferret under observation.
